# Supplementary material for: Benefits of realist evaluation for rapidly changing health service delivery
Source: PubMed Central journal article supplement (PMC9335061; doi:10.1136/bmjopen-2021-060347), 2022-07-27
Supplement: bmjopen-2021-060347.draft_revisions.pdf [file bmjopen-2021-060347.draft_revisions.pdf]

# BMJ Open

BMJ Open is committed to open peer review. As part of this commitment we make the peer review history of every article we publish publicly available.

When an article is published we post the peer reviewers' comments and the authors' responses online. We also post the versions of the paper that were used during peer review. These are the versions that the peer review comments apply to.

The versions of the paper that follow are the versions that were submitted during the peer review process. They are not the versions of record or the final published versions. They should not be cited or distributed as the published version of this manuscript.

BMJ Open is an open access journal and the full, final, typeset and author-corrected version of record of the manuscript is available on our site with no access controls, subscription charges or pay-per-view fees (<http://bmjopen.bmj.com>).

If you have any questions on BMJ Open's open peer review process please email [info.bmjopen@bmj.com](mailto:info.bmjopen@bmj.com)

# BMJ Open

## Using Realist Evaluation in the Study of Rapidly Evolving Service Delivery Models: Reflections from the FRONTIER study on First-Contact Physiotherapy

|                                 |                                                                                                                                                                                                                                                                                                                                                                                                                                                                                                                                                                                                                                                                               |
|---------------------------------|-------------------------------------------------------------------------------------------------------------------------------------------------------------------------------------------------------------------------------------------------------------------------------------------------------------------------------------------------------------------------------------------------------------------------------------------------------------------------------------------------------------------------------------------------------------------------------------------------------------------------------------------------------------------------------|
| Journal:                        | <i>BMJ Open</i>                                                                                                                                                                                                                                                                                                                                                                                                                                                                                                                                                                                                                                                               |
| Manuscript ID                   | bmjopen-2021-060347.R1                                                                                                                                                                                                                                                                                                                                                                                                                                                                                                                                                                                                                                                        |
| Article Type:                   | Communication                                                                                                                                                                                                                                                                                                                                                                                                                                                                                                                                                                                                                                                                 |
| Date Submitted by the Author:   | 05-Feb-2022                                                                                                                                                                                                                                                                                                                                                                                                                                                                                                                                                                                                                                                                   |
| Complete List of Authors:       | Jagosh, Justin; University of the West of England<br>Stott, Hannah; University of the West of England<br>Halls, Serena; University of the West of England<br>Thomas, Rachel; University of the West of England<br>Liddiard, Cathy; University of the West of England<br>Cupples, Margaret; Queens University, Belfast, General Practice<br>Cramp, Fiona; The University of the West of England, Allied health professionals<br>Kersten, Paula; Canterbury Christ Church University, School of Health Sciences<br>Foster, Dave; University of the West of England<br>Walsh, Nicola; University of the West of England, Faculty of Health and Applied Sciences, Glenside Campus |
| <b>Primary Subject Heading</b>: | General practice / Family practice                                                                                                                                                                                                                                                                                                                                                                                                                                                                                                                                                                                                                                            |
| Secondary Subject Heading:      | General practice / Family practice                                                                                                                                                                                                                                                                                                                                                                                                                                                                                                                                                                                                                                            |
| Keywords:                       | COVID-19, EDUCATION & TRAINING (see Medical Education & Training), PRIMARY CARE                                                                                                                                                                                                                                                                                                                                                                                                                                                                                                                                                                                               |
|                                 |                                                                                                                                                                                                                                                                                                                                                                                                                                                                                                                                                                                                                                                                               |

SCHOLARONE™  
Manuscripts

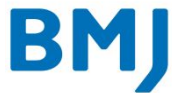

I, the Submitting Author has the right to grant and does grant on behalf of all authors of the Work (as defined in the below author licence), an exclusive licence and/or a non-exclusive licence for contributions from authors who are: i) UK Crown employees; ii) where BMJ has agreed a CC-BY licence shall apply, and/or iii) in accordance with the terms applicable for US Federal Government officers or employees acting as part of their official duties; on a worldwide, perpetual, irrevocable, royalty-free basis to BMJ Publishing Group Ltd ("BMJ") its licensees and where the relevant Journal is co-owned by BMJ to the co-owners of the Journal, to publish the Work in BMJ Open and any other BMJ products and to exploit all rights, as set out in our [licence](#).

The Submitting Author accepts and understands that any supply made under these terms is made by BMJ to the Submitting Author unless you are acting as an employee on behalf of your employer or a postgraduate student of an affiliated institution which is paying any applicable article publishing charge ("APC") for Open Access articles. Where the Submitting Author wishes to make the Work available on an Open Access basis (and intends to pay the relevant APC), the terms of reuse of such Open Access shall be governed by a Creative Commons licence – details of these licences and which [Creative Commons](#) licence will apply to this Work are set out in our licence referred to above.

Other than as permitted in any relevant BMJ Author's Self Archiving Policies, I confirm this Work has not been accepted for publication elsewhere, is not being considered for publication elsewhere and does not duplicate material already published. I confirm all authors consent to publication of this Work and authorise the granting of this licence.

1  
2  
3 **Using Realist Evaluation in the Study of Rapidly Evolving Service Delivery Models: Reflections**  
4  
5  
6 **from the FRONTIER study on First-Contact Physiotherapy**  
7  
8  
9

10 Justin Jagosh (Corresponding Author)  
11 Centre for Advancement in Realist Evaluation and Synthesis (CARES)  
12 [justin.jagosh@realistmethodology-cares.org](mailto:justin.jagosh@realistmethodology-cares.org)  
13  
14

15 Hannah Stott  
16 University of the West of England  
17  
18

19 Serena Halls  
20 University of the West of England  
21  
22

23 Rachel Thomas  
24 University of the West of England  
25  
26

27 Cathy Liddiard  
28 University of the West of England  
29  
30

31 Margaret Cupples  
32 Queen's University, Belfast  
33  
34

35 Fiona Cramp  
36 University of the West of England  
37  
38

39 Paula Kersten  
40 Canterbury Christ Church University  
41  
42

43 Dave Foster  
44 Patient Research Partner  
45  
46

47 Nicola Walsh  
48 University of the West of England  
49  
50  
51  
52  
53  
54  
55  
56  
57  
58  
59  
60

1  
2  
3  
4  
5  
6 Abstract: Realist Evaluation is a methodology that addresses the questions, 'what works, for  
7  
8 whom, in which circumstances, and how?' In times of rapid context change, the approach may  
9  
10 be advantageous in relation to counter-factual statistical investigations such as randomized  
11  
12 controlled trials, as the latter may require relatively stable implementation processes and  
13  
14 contexts to fairly assess comparisons. With realist evaluation, researchers cycle through  
15  
16 iterative phases of theory development testing for interventions if they are evolving in real  
17  
18 time. Reflecting on our work conducting a realist evaluation of First-Contact Physiotherapy  
19  
20 (FCP) during the COVID-19 pandemic, we identify five important considerations for assessing  
21  
22 rapidly evolving service delivery models. These include to: (1) ensure initial programme theories  
23  
24 are formulated via creative thinking sessions, literature, and stakeholder consultation; (2) test  
25  
26 the causal impact of formal and informal (e.g., emergent) components of service delivery  
27  
28 models. (3) theorize using comparisons and rival theory statements; (4) envision broad system  
29  
30 impacts beyond the immediate implementation setting; and (5) incorporate rapidly evolving  
31  
32 service developments and context changes (e.g COVID-19) into the theory testing process in  
33  
34 real-time. Through the reflections presented in this paper, we hope our demonstration of  
35  
36 realist evaluation and the FRONTIER experience will help other teams improve the design of  
37  
38 studies used to assess emerging and rapidly changing service delivery models.  
39  
40  
41  
42  
43  
44  
45  
46  
47  
48  
49  
50  
51  
52  
53  
54  
55  
56  
57  
58  
59  
60

## Introduction

Realist methodology is used for investigating how programmes work, for whom and in which circumstances [1, 2]. Although gaining widespread recognition for its value in assessing complexity across health and social service sectors [3], guidance is sparse on using the realist approach to assess rapidly evolving models of health service delivery. Health services can evolve due to shifting clinical need, competing health policies, and resource scarcity. Initiatives may also evolve due to practical necessities realized only during the service embedding process. Complicating the evaluation of such new efforts is the layering of interventions on existing services to address deficits and meet the needs of increasing demand. As trends and political priorities shift, new service delivery models may be terminated before substantial evidence of success or failure can accumulate. The resources of terminated interventions are often re-purposed for newer initiatives all within the reality of ever-evolving contexts. Realist evaluation is a suitable methodology to assess interventions in times of rapid change as it brings attention to key mechanisms of programmes and aspects of the context that matter, and such insights can be taken forward to other studies as programmes evolve and are re-purposed. In this way, realist evaluations cumulate so as to not “re-invent the wheel” with every study and learn from the relevant programme theorizing that has come before [1].

**Understanding Realist Evaluation:** Realist evaluations of service delivery models typically involve the development of initial programme theories (IPTs) which are causal statements (e.g., ‘if...then’) hypothesizing how programme strategies and components work to produce

1  
2  
3 outcomes. Protocols are developed to collect and analyse data to test the IPTs. Deductive  
4  
5 (theory-testing) as well as inductive (theory-gleaning) approaches are used to build a  
6  
7 retroductive analysis to uncover underpinning explanatory mechanisms [4, 5]. Realist  
8  
9 evaluation uses context-mechanism-outcome (CMO) configurations to achieve generative  
10  
11 explanatory insights. Programme mechanisms are underpinning generative forces in terms of  
12  
13 how people respond to resources [6]. Context may include elements of causal impact outside  
14  
15 the set of formal programme resources [2, 7, 8]. Outcomes are typically understood as  
16  
17 measurable impacts at the behavioural, clinical or systems level. Realist evaluations are  
18  
19 sometimes accompanied by a realist review [9], which is a literature-based analysis of  
20  
21 programme theories related to the intervention under scrutiny.  
22  
23  
24  
25  
26

27  
28 In this paper, we reflect on the FRONTIER study, which is a UK-based *National Institute for*  
29  
30 *Health Research* (NIHR) funded study <https://fundingawards.nihr.ac.uk/award/16/116/03>  
31  
32 examining First-Contact Practitioner (Physiotherapist) (FCPP). FCPP introduces specialist and  
33  
34 advanced practice physiotherapy within primary care to assess, diagnose, treat and discharge  
35  
36 patients presenting with musculoskeletal (MSK) disorders without the requirement for a prior  
37  
38 general practitioner (GP) consultation [10]. FCPP is a model developed in contrast to many  
39  
40 traditional service delivery models for MSK management in which patients are seen by a  
41  
42 physiotherapist only after receiving a referral from a GP or consultant. FCPPs are intended to  
43  
44 work in directly in the primary care setting, allowing patients to self-refer or book via reception  
45  
46 staff who have added decision-making responsibilities for the care pathway for MSK patients.  
47  
48  
49  
50  
51 Our realist evaluation has revealed that the FCPP embedding process is complex and impacts  
52  
53 GPs, reception staff, patients, physiotherapists, and the wider health system. We discuss five  
54  
55  
56  
57  
58  
59  
60

1  
2  
3 important considerations for assessing rapidly evolving service delivery models using the realist  
4  
5 evaluation methodology.  
6  
7

8 Table 1: Five Points of Guidance on Conducting a Realist Evaluation of Rapidly Evolving Service  
9 Delivery  
10  
11  
12  
13  
14

- |                                                                                                                                                                                                                                                                                                                                                                                                                                                                                                                                                                                                                                    |
|------------------------------------------------------------------------------------------------------------------------------------------------------------------------------------------------------------------------------------------------------------------------------------------------------------------------------------------------------------------------------------------------------------------------------------------------------------------------------------------------------------------------------------------------------------------------------------------------------------------------------------|
| <p>15 1. Develop initial programme theories using team-based brainstorming, literature, and<br/>16 stakeholder consultation.<br/>17<br/>18 2. Test causal impact of both the formal and informal (e.g., emergent) architecture of service<br/>19 delivery models.<br/>20<br/>21 3. Theorize using comparisons and rival theory statements.<br/>22<br/>23 4. Envision broad system impacts beyond the immediate implementation settings.<br/>24<br/>25 5. Incorporate rapidly evolving service developments and context changes (e.g COVID-19) into<br/>26 the theory testing process in real-time.<br/>27<br/>28<br/>29<br/>30</p> |
|------------------------------------------------------------------------------------------------------------------------------------------------------------------------------------------------------------------------------------------------------------------------------------------------------------------------------------------------------------------------------------------------------------------------------------------------------------------------------------------------------------------------------------------------------------------------------------------------------------------------------------|

31  
32  
33  
34  
35 **1. Develop initial programme theories using a combination of team-based brainstorming,  
36 literature, and stakeholder consultation.**  
37

38  
39  
40 Published high-quality literature is often sought to inform the development of IPTs at the  
41  
42 outset of a realist evaluation. However new and progressed service delivery models lack a  
43  
44 historical trail of evidence regarding success and failure, nor of details on the programme's  
45  
46 architecture, especially the informal aspects. These unknowns preclude easy identification of  
47  
48 IPTs from pre-existing literature. For this reason, IPT development requires creative thinking  
49  
50 and consultation with key stakeholders at the early stages. Such activities will bring IPT  
51  
52 theorizing to the current programme developments, and likely produce hypothetical insights  
53  
54  
55  
56  
57  
58  
59  
60



1  
2  
3 about the mechanisms at play, which may be obscured in literature sources [11, 12]. Data  
4  
5 sources can be expanded to include unpublished (grey) literature, policy documents, online  
6  
7 blogs and forums, and professional body documentation.  
8  
9

10 **Lessons from FRONTIER:** For the FRONTIER project, a six-month realist synthesis was scheduled  
11  
12 at the outset of the project to develop the IPTs and establish a suitable research scope to  
13  
14 examine the most important facets of the architecture of the emerging FCPP model. The body  
15  
16 of high-quality empirical literature on FCPP was found to be limited and papers did not reveal  
17  
18 clearly articulated programme theories that could be imported to the current study. However,  
19  
20 the literature was helpful to stimulate creative thinking and discussion within the team, which  
21  
22 informed the development of the IPTs. We found that online blogs in which physiotherapists  
23  
24 candidly talked about their experience of working in general practice provided greater insight  
25  
26 into contemporary implementation issues than the published empirical work.  
27  
28  
29  
30  
31  
32  
33  
34  
35

## 36 **2. Test causal impact of both the formal and informal (e.g. emergent) architecture of service** 37 **delivery models.**

38  
39 Programme architecture constitutes the spectrum of strategies and resources that are both  
40  
41 formally allocated through policy guidance as well as assembled and adapted informally from  
42  
43 existing resources in the context of implementation. IPTs developed and tested in a realist  
44  
45 evaluation can account for both the formal and informal architecture of programmes. Policy  
46  
47 documentation on service re-organization often involves descriptions of formal architecture.  
48  
49 However, implementation processes require, for example, local-level skills such as  
50  
51 communication and collaborative know-how. The theorizing process in a realist evaluation can  
52  
53  
54  
55  
56  
57  
58  
59  
60

1  
2  
3 begin with a consideration of formal strategies, followed by informal strategies explaining the  
4  
5 success of embedding programmes over time. The combination of formal and informal theories  
6  
7 may form a complete picture of how the programme evolves in real time.  
8  
9

### 10 11 **Lessons from FRONTIER:**

12  
13 Taking FCPP banding (i.e., payscale and associated skill-level) as an example, documents from  
14  
15 Health Education England (HEE) were scrutinized to understand the recommendations for how  
16  
17 FCPP roles should be implemented in primary care settings. HEE states that “a First Contact  
18  
19 Practitioner (FCP) is a diagnostic clinician working in Primary Care at the top of their clinical  
20  
21 scope of practice at masters level Agenda for Change Band 7 or equivalent and above. This  
22  
23 allows the FCP to be able to assess and manage undifferentiated and undiagnosed MSK  
24  
25 presentations” [13]. However, banding for FCPP roles vary. We determined that the  
26  
27 architecture of FCPP changes with banding such that those physiotherapists who have greater  
28  
29 experience and clinical capability and therefore may be able to prescribe and inject are  
30  
31 potentially vulnerable to time pressures in a primary care clinic, whereas those  
32  
33 physiotherapists, who cannot prescribe and inject, use traditional physiotherapy approaches  
34  
35 such as physical exercise, education and communication with the patient (in opposition to  
36  
37 injections and prescription). Paradoxically, lower banded physiotherapists may provide  
38  
39 traditional forms of physiotherapy with a required appointment length of 20 minutes, whereas  
40  
41 higher banded professionals may lean on injections and prescriptions thus reducing  
42  
43 appointment length. These differences may impact clinical and cost outcomes in unexpected  
44  
45 ways. While formal guidance outlines general principles of FCP banding and pay structure,  
46  
47  
48  
49  
50  
51  
52  
53  
54  
55  
56  
57  
58  
59  
60

1  
2  
3 variation in banding at the local level means that primary care managers are left on their own  
4  
5 to try to understand and make decisions regarding FCPP service architecture.  
6  
7  
8  
9

### 10 **3. Theorize using comparisons and rival theory statements**

11 Initial programme theories that contrast new initiatives with older established practices can be  
12  
13 important to determine clinical and cost effectiveness of new efforts. Contrastive statements in  
14  
15 the development of IPTs need to include 'how, why, and for whom' content to fit with the  
16  
17 retroductive theorizing objective of realist evaluation. This is different from counter-factual  
18  
19 causal analysis [14] in which causal claims are established through high-volume correlation (A  
20  
21 leads to B across many cases). Two advantages in including realist contrastive and rival theories  
22  
23 are (a) to help determine if new initiatives layered on existing services yield at least no worse  
24  
25 clinical and cost outcomes than standard practices alone; and (b) to contrast models to unearth  
26  
27 elements of context which would otherwise remain hidden from view.  
28  
29  
30  
31  
32  
33  
34

35 **Lessons from FRONTIER:** For the FRONTIER project, the overburdened traditional model of GP-  
36  
37 led MSK care delivery made the inclusion of contrastive ideas in theorising valuable. The realist  
38  
39 evaluation was used to understand how different GP practices employ physiotherapists  
40  
41 differently, in order to tease out the causal contribution of different facets of the FCPP model.  
42  
43 One contrastive theory related to the upskilling and deskilling of GPs when physiotherapists are  
44  
45 included in primary care. We theorized that the presence of physiotherapists in primary care  
46  
47 unburdens physicians by attending to all the patients with MSK complaints but results in a de-  
48  
49 skilling effect for GPs in relation to their MSK expertise. To contrast this, we theorized the  
50  
51 opposite effect: that physiotherapists working in primary care help GPs upskill in relation to  
52  
53  
54  
55  
56  
57  
58  
59  
60

1  
2  
3 MSK issues by exposure to specialized knowledge, skills and innovations that the  
4  
5  
6 physiotherapist brings to the surgery. These theories were then tested through data collection.  
7  
8  
9

#### 10 **4. Envision broad system impacts beyond the immediate implementation setting**

11  
12

13  
14 New models of service delivery can mean moving resources from one part of a system to  
15  
16 another (e.g. moving staff from secondary to primary care). This movement of resources may  
17  
18 relieve problems in the destination area but create new staff challenges in the areas where  
19  
20 resources originated. Such re-organization efforts require theorizing the broader impacts as  
21  
22 well as the longer-term ripple effects. It may be difficult to capture evidence to test theories of  
23  
24 broad and longer-term impact. However, such theorizing may still be useful for future research  
25  
26 in the field, as well as on-going programme monitoring.  
27  
28  
29

30  
31 **FRONTIER Experience:** FCPP is a model that requires the movement of physiotherapists from  
32  
33 secondary to primary healthcare settings. In some cases, this has resulted in the depletion in  
34  
35 part of senior physiotherapists in secondary care settings who treat more complex MSK cases  
36  
37 than in primary care. Attention needs to be paid to ensuring senior staff are retained at least,  
38  
39 in part, in secondary care to manage complexity and also to support junior staff in secondary  
40  
41 care settings.  
42  
43  
44  
45  
46

#### 47 **5. Incorporate rapidly evolving service developments and context changes (e.g COVID-19) into** 48 **the theory testing process in real-time.**

49

50 Rapid shifts in service development may require realist evaluators to abandon theories  
51  
52 developed at the outset of a study in favor of theories that become increasingly relevant over  
53  
54 time. The abrupt rupture in the health service landscape brought on by the 2020 COVID-19  
55  
56  
57  
58  
59

1  
2  
3 pandemic exemplifies the need to study causal impact of contemporary and emergent changes  
4  
5 in real time [15]. For rapidly changing models of service delivery, the output of the realist  
6  
7 evaluation needs to account for new and divergent models that have emerged out of necessity  
8  
9  
10 over the course of the research project.

11  
12  
13 **Frontier Experience:** The COVID-19 pandemic has dramatically impacted the FCPP service  
14  
15 delivery model during the realist evaluation. It resulted in a UK wide lockdown initiated in  
16  
17 March 2020, alongside advice to stop the delivery of all non-essential face-to-face health and  
18  
19 social care [16]. For the physiotherapy profession, this meant an immediate and considerable  
20  
21 change to physiotherapy provision with a rapid shift to remote consultations, for which the  
22  
23 Chartered Society published delivery guidance. Although this service change was planned for  
24  
25 future implementation (<https://www.longtermplan.nhs.uk/online-version>) the advent of the  
26  
27 pandemic expedited its introduction and created little time for preparation or training. Whilst  
28  
29 some in the field considered this a beneficial service development that saved time and was  
30  
31 more convenient for many patients, others questioned whether patients considered it a 'valid'  
32  
33 consultation and raised concerns regarding the greater potential for misdiagnosis and service  
34  
35 inefficiencies.  
36  
37  
38  
39  
40  
41  
42  
43

44 There is a potential for the shift to online service provision to have long-term implications for  
45  
46 physiotherapy practice and therefore FCPP implementation, although the extent of this impact  
47  
48 remains uncertain. In addition to the implications for practice, the shift has had implications for  
49  
50 the proposed FCP programme theories, as the theories to date have been generated on the  
51  
52 basis of physical ('in house') co-location of FCPs in primary care.  
53  
54  
55  
56  
57  
58  
59  
60

## Discussion

There is a need to maintain an iterative and adaptive position to theorizing in realist evaluation implementation as contexts change rapidly. It may feel necessary to abandon early theorizing if this becomes out of step with current developments in the service architecture. This is a normal process and it takes time to achieve clarity regarding important aspects of programmes for theory testing. The rapid evolution that new initiatives undergo can be as a result of overcoming implementation barriers created by new policy. In this regard, the foci of theory development and testing may shift over the duration of a realist investigation. This is advantageous as the outputs of such realist evaluations may yield important insights regarding programme success and failure that can be carried forward in future research and programme monitoring.

In addition, the creative thinking that occurs at the outset of a realist study can be beneficial to study programmes in evolution as it increases the agility that research teams need to adapt theory and research protocols. Inevitably, some theories will always be difficult to test due to a lack of available data. Nonetheless the development of such theories contributes to a cumulative body of work that lends itself to future study. Initial theorizing may also yield an over abundance of theories (e.g.,  $n > 30$ ), requiring teams to consolidate and prioritize those theories to move forward for testing. An important lesson from the FRONTIER study is that the creative thinking conducted at the outset of the study was invaluable even if not all of it was taken forward. We found that the initial stage of our realist investigation was as much 'theory development' as it was 'theory sensitization.'

1  
2  
3 As health systems evolve worldwide, it is necessary that methodologies such as Realist  
4  
5 Evaluation be used and developed to capture the real-time changes and their causal impacts, to  
6  
7 serve the needs of programme implementation. Through the reflections presented in this  
8  
9 paper, we hope our demonstration of realist evaluation and the FRONTIER experience will help  
10  
11 other teams improve the design of studies used to assess emerging and rapidly changing service  
12  
13 delivery models.  
14  
15  
16  
17  
18  
19  
20  
21  
22  
23  
24  
25

## 26 **Declarations**

27  
28 Ethics approval and consent to participate: IRAS261530  
29

30  
31 Consent for publication: not applicable  
32

33  
34 Availability of data and materials: not applicable  
35

36  
37 Competing interests: The authors declare no competing interests  
38

## 39 **Funding:**

40  
41 This study is funded by the National Institute for Health Research (NIHR) HS&DR HIHR programme  
42 (16/116/03)/name of part of the NIHR]. The views expressed are those of the authors and not  
43 necessarily those of the NIHR or the Department of Health and Social Care.  
44  
45  
46

47  
48 Authors' contributions: JJ wrote was responsible for submitting the manuscript. Co-authors HS,  
49 SH, RT, CL, NW provided multiple rounds of feedback. Authors MC, PK, DF, FC provided  
50 feedback on the final draft. All authors were involved in the design and analysis phases of the  
51 FRONTIER project.  
52  
53  
54  
55  
56  
57  
58  
59  
60

Acknowledgements: not applicable

## References

1. Pawson, R. and N. Tilley, *Realistic Evaluation*. 1997, London: Sage.
2. Jagosh, J., *Realist Synthesis for Public Health: Building an Ontologically Deep Understanding of How Programs Work, For Whom, and In Which Contexts*. Annual Review of Public Health, 2019. **40**(1): p. 361-372.
3. Rycroft-Malone, J., et al., *Realist synthesis: illustrating the method for implementation research*. Implement Sci, 2012. **7**.
4. Jagosh, J., *Retroductive theorizing in Pawson and Tilley's applied scientific realism*. Journal of Critical Realism, 2020. **19**(2): p. 121-130.
5. Manzano, A., *The craft of interviewing in realist evaluation*. Evaluation, 2016. **22**(3): p. 342-360.
6. Dalkin, S.M., et al., *What's in a mechanism? Development of a key concept in realist evaluation*. Implementation Science, 2015. **10**(1): p. 49.
7. Jagosh, J., et al., *A realist evaluation of community-based participatory research: partnership synergy, trust building and related ripple effects*. BMC Public Health, 2015. **15**(1): p. 725.
8. Greenhalgh, J. and A. Manzano, *Understanding 'context' in realist evaluation and synthesis*. International Journal of Social Research Methodology, 2021: p. 1-13.
9. Hunter, R., et al., *Realist review*. International Review of Sport and Exercise Psychology, 2022: p. 1-24.
10. *Elective Care High Impact Interventions: First Contact Practitioner for MSK Services*, N.E.a.N. Improvement, Editor. 2019.
11. Goodman C, D.S., Gordon AL, Denning T, Gage H, Meyer J, Schneider J, Bell B, Jordan J, Martin F, Illiffe S, Bowman C, Gladman JRF, Victor C, Mayrhofer A, Handley M & Zubair M., *Optimal NHS service delivery to care homes: a realist evaluation of the features and mechanisms that support effective working for the continuing care of older people in residential settings*. 2013.
12. Dr Recebba Randell, K., Mr David Wilkinson, Mr Gerard Perez, Mrs Jane Millar, Ms Julie Croft, Professor (Elizabeth) Andrea Nelson, Professor Alan Pearman, Professor Andrew Long, Professor David Jayne, Professor Dawn Dowding, Professor Joanne Greenhalgh, Professor Jon Hindmarsh, Professor Peter Gardner., *A realist process evaluation of robotic surgery: integration into routine practice and impacts on communication, collaboration and decision making*. 2013.
13. *First Contact Practitioners and Advanced Practitioners in Primary Care: (Musculoskeletal): A Roadmap to Practice*, H.E. England, Editor. 2019.
14. Pawson, R., *Causality for beginners.*, N.R.M. Festival, Editor. (2008).
15. Available from:  
[https://www.csp.org.uk/system/files/publication\\_files/Remote%20consultations%20top%20tips%20v9.pdf](https://www.csp.org.uk/system/files/publication_files/Remote%20consultations%20top%20tips%20v9.pdf).
16. Downey, A., *GPs urged to go digital to prevent spread of coronavirus*, in *Digital Health*. 2020.



1  
2  
3  
4  
5  
6  
7  
8  
9  
10  
11  
12  
13  
14  
15  
16  
17  
18  
19  
20  
21  
22  
23  
24  
25  
26  
27  
28  
29  
30  
31  
32  
33  
34  
35  
36  
37  
38  
39  
40  
41  
42  
43  
44  
45  
46  
47  
48  
49  
50  
51  
52  
53  
54  
55  
56  
57  
58  
59  
60

For peer review only

# BMJ Open

## The benefits of realist evaluation for rapidly changing health service delivery models

|                                 |                                                                                                                                                                                                                                                                                                                                                                                                                                                                                                                                                                                                                                                                               |
|---------------------------------|-------------------------------------------------------------------------------------------------------------------------------------------------------------------------------------------------------------------------------------------------------------------------------------------------------------------------------------------------------------------------------------------------------------------------------------------------------------------------------------------------------------------------------------------------------------------------------------------------------------------------------------------------------------------------------|
| Journal:                        | <i>BMJ Open</i>                                                                                                                                                                                                                                                                                                                                                                                                                                                                                                                                                                                                                                                               |
| Manuscript ID                   | bmjopen-2021-060347.R2                                                                                                                                                                                                                                                                                                                                                                                                                                                                                                                                                                                                                                                        |
| Article Type:                   | Communication                                                                                                                                                                                                                                                                                                                                                                                                                                                                                                                                                                                                                                                                 |
| Date Submitted by the Author:   | 14-Jun-2022                                                                                                                                                                                                                                                                                                                                                                                                                                                                                                                                                                                                                                                                   |
| Complete List of Authors:       | Jagosh, Justin; University of the West of England<br>Stott, Hannah; University of the West of England<br>Halls, Serena; University of the West of England<br>Thomas, Rachel; University of the West of England<br>Liddiard, Cathy; University of the West of England<br>Cupples, Margaret; Queens University, Belfast, General Practice<br>Cramp, Fiona; The University of the West of England, Allied health professionals<br>Kersten, Paula; Canterbury Christ Church University, School of Health Sciences<br>Foster, Dave; University of the West of England<br>Walsh, Nicola; University of the West of England, Faculty of Health and Applied Sciences, Glenside Campus |
| <b>Primary Subject Heading</b>: | General practice / Family practice                                                                                                                                                                                                                                                                                                                                                                                                                                                                                                                                                                                                                                            |
| Secondary Subject Heading:      | General practice / Family practice                                                                                                                                                                                                                                                                                                                                                                                                                                                                                                                                                                                                                                            |
| Keywords:                       | COVID-19, EDUCATION & TRAINING (see Medical Education & Training), PRIMARY CARE                                                                                                                                                                                                                                                                                                                                                                                                                                                                                                                                                                                               |
|                                 |                                                                                                                                                                                                                                                                                                                                                                                                                                                                                                                                                                                                                                                                               |

SCHOLARONE™  
Manuscripts

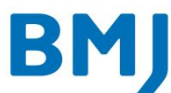

I, the Submitting Author has the right to grant and does grant on behalf of all authors of the Work (as defined in the below author licence), an exclusive licence and/or a non-exclusive licence for contributions from authors who are: i) UK Crown employees; ii) where BMJ has agreed a CC-BY licence shall apply, and/or iii) in accordance with the terms applicable for US Federal Government officers or employees acting as part of their official duties; on a worldwide, perpetual, irrevocable, royalty-free basis to BMJ Publishing Group Ltd ("BMJ") its licensees and where the relevant Journal is co-owned by BMJ to the co-owners of the Journal, to publish the Work in BMJ Open and any other BMJ products and to exploit all rights, as set out in our [licence](#).

The Submitting Author accepts and understands that any supply made under these terms is made by BMJ to the Submitting Author unless you are acting as an employee on behalf of your employer or a postgraduate student of an affiliated institution which is paying any applicable article publishing charge ("APC") for Open Access articles. Where the Submitting Author wishes to make the Work available on an Open Access basis (and intends to pay the relevant APC), the terms of reuse of such Open Access shall be governed by a Creative Commons licence – details of these licences and which [Creative Commons](#) licence will apply to this Work are set out in our licence referred to above.

Other than as permitted in any relevant BMJ Author's Self Archiving Policies, I confirm this Work has not been accepted for publication elsewhere, is not being considered for publication elsewhere and does not duplicate material already published. I confirm all authors consent to publication of this Work and authorise the granting of this licence.

## The benefits of realist evaluation for rapidly changing health service delivery models

Justin Jagosh

Centre for Advancement in Realist Evaluation and Synthesis (CARES)

Hannah Stott

Centre for Health and Clinical Research, University of the West of England (UWE), Bristol

Serena Halls

Centre for Health and Clinical Research, University of the West of England (UWE), Bristol

Rachel Thomas

Centre for Health and Clinical Research, University of the West of England (UWE), Bristol

Cathy Liddiard

Centre for Health and Clinical Research, University of the West of England (UWE), Bristol

Margaret E Cupples

Centre for Public Health Research, School of Medicine, Queen's University, Belfast

Fiona Cramp

Centre for Health and Clinical Research, University of the West of England (UWE), Bristol

Paula Kersten

Canterbury Christ Church University

Dave Foster

Patient Research Partner/Public contributor

Nicola Walsh

Centre for Health and Clinical Research, University of the West of England (UWE), Bristol

### Correspondence to:

Justin Jagosh, Centre for Advancement in Realist Evaluation and Synthesis (CARES)

[j.jagosh@realistmethodology-cares.org](mailto:j.jagosh@realistmethodology-cares.org)

## Abstract

Realist evaluation is a methodology that addresses the questions: 'what works, for whom, in which circumstances, and how?' In this approach, programme theories are developed and tested against available evidence. However, when complex interventions are implemented in rapidly changing environments, there are many unpredictable forces that determine the programme's scope and architecture, as well as resultant outcome. These forces can be theorized, in real time, and included in realist evaluation outputs for current and future optimization of programmes. Reflecting on a realist evaluation of first-contact physiotherapy in primary care (the FRONTIER Study), five important considerations are described for improving the quality of realist evaluation outputs when studying rapidly changing health service delivery models. These are: (1) ensuring that initial programme theories are developed through creative thinking sessions, empirical and non-empirical literature, and stakeholder consultation; (2) testing the causal impact of formal and informal (e.g., emergent) components of service delivery models; (3) contrasting initial programme theories with rival theory statements; (4) envisioning broad system impacts beyond the immediate implementation setting; and (5) incorporating rapidly evolving service developments and context changes into the theory testing process in real-time (e.g., Additional Role Reimbursement Scheme, COVID-19). Through the reflections presented, the aim is to clarify the benefit of realist evaluation to assess emerging and rapidly changing service delivery models.

## Introduction

Realist methodology is used for investigating how programmes work, for whom and in which circumstances [1, 2]. Although gaining widespread recognition for its value in assessing complexity across health and care sectors [3], guidance is sparse on using the realist approach to assess evolving models of health service delivery embedded in rapidly changing contexts. Shifting clinical need, heavy caseloads, competing health policies, and resource scarcity are a few reasons why health services may shift and evolve. Initiatives may also change due to practical necessities realized only during the implementation process. Complicating the evaluation of new efforts is the layering of interventions on existing services to address deficits and demands. As trends, needs and priorities shift, new models of service delivery may be terminated before substantial evidence of success or failure can accumulate. The resources of terminated interventions are often re-purposed for newer initiatives which are then launched again without a strong or insightful base of evidence. Realist evaluation is a suitable methodology to assess interventions under these conditions as the approach brings attention to the key hypothesized mechanisms of programmes and aspects of the context that matter, and such insights can be taken forward to other studies as programmes evolve and are re-purposed. In this way, realist evaluations cumulate efforts to not “re-invent the wheel” with every study, and to learn from the relevant programme theorizing that has come before [1].

This paper provides reflections on the FRONTIER study, which is a UK-based *National Institute for Health Research* (NIHR) funded study (<https://fundingawards.nihr.ac.uk/award/16/116/03>) examining first-contact physiotherapy (FCP). FCP introduces specialist, and in some cases, advanced practice physiotherapists into primary care settings to assess, diagnose, treat, and

1  
2  
3 manage patients presenting with musculoskeletal (MSK) disorders without the requirement for  
4  
5 a prior general practitioner (GP) consultation [4]. FCP is a model developed as an alternative to  
6  
7 traditional primary care service for MSK management in which patients are seen by a  
8  
9 physiotherapist only after receiving a referral from a GP. In the new model, FCPs work at  
10  
11 primary care sites, allowing patients direct access through self-referral or reception triage. The  
12  
13 FCP embedding process is complex and impacts general practitioners, reception staff, patients,  
14  
15 physiotherapists, and the wider health system. Whilst FCP services have been in existence over  
16  
17 the last decade, their contribution to the primary care workforce has significantly increased  
18  
19 more recently in response to the NHS Long Term Plan  
20  
21 (<https://www.longtermplan.nhs.uk/publication/nhs-long-term-plan/>) and actioned through the  
22  
23 Additional Roles Reimbursement Scheme ([https://www.england.nhs.uk/wp-](https://www.england.nhs.uk/wp-content/uploads/2019/12/network-contract-des-additional-roles-reimbursement-scheme-guidance-december2019.pdf)  
24  
25 [content/uploads/2019/12/network-contract-des-additional-roles-reimbursement-scheme-guidance-](https://www.england.nhs.uk/wp-content/uploads/2019/12/network-contract-des-additional-roles-reimbursement-scheme-guidance-december2019.pdf)  
26  
27 [december2019.pdf](https://www.england.nhs.uk/wp-content/uploads/2019/12/network-contract-des-additional-roles-reimbursement-scheme-guidance-december2019.pdf)). In England, the aim is for all adults to have access to a FCP by 2024  
28  
29 (<https://www.england.nhs.uk/gp/expanding-our-workforce/first-contact-physiotherapists/>).

30  
31  
32  
33  
34  
35  
36  
37  
38  
39  
40 Five important insights for conducting a realist evaluation in the context of rapidly evolving  
41  
42 contexts are presented in Table 1. These considerations are explored further in the sections  
43  
44 below, along with a brief description of the process of conducting a realist evaluation.  
45  
46

47  
48 **Table 1: Five important considerations for conducting a realist evaluation for rapidly**  
49 **changing health service delivery models**

50  
51 (1) Ensuring that initial programme theories are developed through creative thinking sessions,  
52 empirical and non-empirical literature, and stakeholder consultation.

53  
54 (2) Analysing data to test the causal impact of formal and informal (e.g., emergent)  
55 components of service delivery models.  
56

(3) Contrasting initial programme theories with rival theory statements (i.e., how the same resources can trigger very different responses and outcomes).

(4) Envisioning broad system impacts beyond the immediate implementation setting.

(5) Incorporating rapidly evolving service developments and context changes into the theory testing process in real-time (e.g., Additional Role Reimbursement Scheme, COVID-19).

### Understanding realist evaluation

Realist evaluations of service delivery models typically involve the development of initial programme theories (IPTs) which are causal statements (e.g., ‘if...then’) hypothesizing how programme outcomes are manifested through programme mechanisms and corresponding contexts (see Table 2 for an example). Protocols are developed to collect and analyse data to test the IPTs. Deductive (theory-testing) as well as inductive (theory-gleaning) activities are used to build a proposed process to uncover underpinning explanatory mechanisms. This is known as *retroduction* (see definition in table 2) [5, 6]. Realist evaluation uses context-mechanism-outcome (CMO) configurations to achieve explanatory insights in theory development and data analysis. Programme mechanisms are understood to be underpinning generative forces that produce outcomes that activate in conducive contexts. Specifically, mechanisms are defined as the reasoning, response, or reaction by stakeholders (e.g., patients, staff) to programme resources. Programme resources may be formal or informal [2, 7]. Context may include aspects of causal impact that reside outside the scope of the programme’s architecture [8, 9]. Outcomes can be quantitative or qualitative data typically seen as measurable impacts in behavioural, clinical, or system-level terms (see Table 2 for an example). Realist evaluations are often accompanied by a realist review (also known as realist synthesis)



[10], which is a literature-based realist analysis of programme theories related to the interventions under scrutiny.

**Table 2: Definition and examples of terms used in realist evaluation**

**Context-Mechanism-Outcome Configuration:** The central heuristic used in realist evaluation to understand what works, for whom, under which circumstances and how. Context is the backdrop of programmes whereas mechanism is how stakeholders respond to resources. Outcome is measurable impact at the behavioural, clinical or system level. For example, *Context: Physiotherapists often have more specialist knowledge regarding MSK conditions compared to general practitioners. Mechanism: First-point-of-contact physiotherapists are able to diagnose complicated MSK conditions in primary care and provide immediate access to tailored interventions for patients (resource) which reassures patients and physicians that patients are getting the timely MSK management they need (response). Outcome: Improved patient outcomes and satisfaction; increased staff satisfaction; fewer appointments required in onward referral; upskilling of GPs; fewer prescriptions.*

**Initial Programme Theory:** A hypothetical statement, often in the form of 'if...then,' that is developed at the start of a realist evaluation to explain how a programme or programme component works to produce outcomes. IPTs can take the form of rough (incomplete) CMO configurations. For example: *"If the primary care practice expects FCPs to allot a maximum of ten minutes to manage a MSK patient appointment in line with standard GP appointment length, and FCPs challenge this expectation based on a 20-minute appointment length which is standard to traditional physiotherapy, then GPs may perceive FCPs as being inefficient and may look to employ other practitioners in the future."*

**Rival Theory:** A hypothetical statement that shows how the same programme resources can lead to very different responses and outcomes. For example: *Rival Theory A – Physiotherapists working in primary care unburden GPs by attending to patients with MSK disorders. The reduced exposure to patients with MSK conditions results in GPs experiencing a de-skilling of MSK expertise. Rival Theory B - Physiotherapists working in primary care expose GPs to expert MSK management, resulting in GPs upskilling their MSK expertise.*

**Contrastive Theory:** A hypothetical statement that explains how a programme strategy works in comparison to a different programme strategy: For example: *If a FCP does not have injecting or prescribing qualifications then they will rely on traditional physiotherapy modalities for patient care (i.e., exercise, education, and lifestyle approaches). This contrasts with FCPs who do have said qualifications and may utilise injections and prescriptions more readily. The FCP who uses traditional modalities may provide improved patient outcomes over time over those who do not, due to the holistic approach inherent to those modalities.*

**Programme Architecture:** The complete set of strategies/components that comprise an intervention, both formally allocated and advised as well as informally assembled and adapted from local resources and deficits. For example, formal architecture of FCP includes banding, appointment length, reception staff triage training, and IT system integration. Informal architecture includes patient explanation about the FCP role, staff attitudes, and spontaneous interprofessional coordination efforts between GPs and physiotherapists. Some aspects of the informal architecture may become formalized over time. Realist evaluation is used to understand how a programme works by uncovering the mechanisms underpinning the programme's architecture.

**Retroduction:** A mode of inference that examines empirical outcomes in relation to the corresponding mechanisms of action that serve to produce them. For example: if a patient with an MSK disorder improves their condition by adhering to physiotherapy advice, it can be theorized that trust in the physiotherapist may increase patient motivation to uptake such advice. In this example, MSK disorder improvement is the outcome whereas trust and motivation are mechanisms. The theory is retroductive.

## Important considerations for conducting a realist evaluation for rapidly changing health service delivery models

### ***1. Ensure that initial programme theories are developed through a combination of creative thinking sessions, empirical and non-empirical literature, and stakeholder consultation***

High-quality empirical literature is often sought to inform the development of IPTs at the outset of a realist evaluation. However, new service delivery models typically lack a trail of historical evidence regarding success and failure, and a lack of clarity on the programme's scope and architecture. These unknowns preclude easy identification of IPTs from pre-existing literature. For this reason, IPT development requires team-based creative thinking, consultation with key stakeholders at the early stages and retrieval of empirical as well as non-empirical literature. Such activities will bring initial programme theorizing in line with current developments and will likely produce relevant hypothetical insights about the mechanisms at play, which may be obscured in literature sources. During literature review, data sources should be expanded to include unpublished (grey) literature, policy documents, online blogs and forums, and from professional body documentation.

For the FRONTIER study, a six-month realist synthesis was conducted at the outset, to develop the IPTs and establish a suitable research scope to examine the most important facets of the emerging FCP service delivery model. The body of high-quality empirical literature on FCP was found to be limited and the few research papers retrieved did not describe clear programme theories that could be imported to the study. However, this literature was helpful to stimulate creative thinking and discussion within the team, which informed the development of relevant IPTs. Additional beneficial literature sources included policy documentation, online blogs and editorials in the UK-based physiotherapy professional body magazine 'Frontline'. In reading

1  
2  
3 policy documentation, the description and scope of FCP provided insight into the programme's  
4  
5 formal, expected architecture. In the blog and editorial literature, physiotherapists candidly  
6  
7 described experiences, successes and concerns while working in general practice. Such sources  
8  
9 of literature provided greater insight into the informal, unexpected aspects of the programme  
10  
11 and contemporary implementation issues.  
12  
13  
14  
15

## 16 17 **2. Analyse data to test the causal impact of formal and informal (e.g., emergent) components** 18 **of service delivery models** 19

20 IPTs developed and tested in a realist evaluation can account for both the formal and informal  
21  
22 architecture of programmes (see Table 2). This is particularly important for evolving models of  
23  
24 health service delivery because, as formalized resources are shifted or removed, informal  
25  
26 efforts are often needed to keep programmes afloat. Although policy documentation on service  
27  
28 re-organization will describe formal architecture, implementation processes require additional  
29  
30 undocumented efforts. A realist evaluation can capture these efforts, thus forming a  
31  
32 comprehensive picture of how the programme works and how it evolves in real time.  
33  
34  
35  
36  
37

38 For the FRONTIER study, the issue of pay scale, banding and associated skill-level exemplifies  
39  
40 the importance of understanding formal and informal aspects of the programme. Documents  
41  
42 from Health Education England (HEE) were scrutinized to understand the recommendations for  
43  
44 how FCP roles should be implemented in primary care settings. HEE states that *"a First Contact*  
45  
46 *Practitioner (FCP) is a diagnostic clinician working in Primary Care at the top of their clinical*  
47  
48 *scope of practice at masters level Agenda for Change Band 7 or equivalent and above. This*  
49  
50 *allows the FCP to be able to assess and manage undifferentiated and undiagnosed MSK*  
51  
52 *presentations"* [11]. However, banding for FCP roles varies due to availability of appropriately  
53  
54  
55  
56  
57  
58  
59  
60

1  
2  
3 banded staff for work in general practice. Given this reality, it was observed that the  
4  
5 architecture of FCP changes depending on the banding of the physiotherapist recruited to a  
6  
7 primary care team. Physiotherapists at higher bands, while having greater experience and  
8  
9 clinical capability, were able to offer prescriptions and injection which were frequently not  
10  
11 within the scope of practice for lower banded physiotherapists working as FCPs. Through the  
12  
13 realist evaluation it was theorized that, paradoxically, higher banded physios are potentially  
14  
15 vulnerable to time pressures in primary care (i.e., reducing appointment length) leading to  
16  
17 increased prescribing and injecting as opposed to engaging patients with core physiotherapy  
18  
19 interventions. Alternatively, it was theorized that physiotherapists who were not qualified to  
20  
21 prescribe and inject, were also not vulnerable to pressure to reduce appointment length.  
22  
23 Traditional physiotherapy requires a longer appointment length than a GP appointment to  
24  
25 engage patients with physical exercise, education, and communication. Longer appointment  
26  
27 length also means increased time to establish trust and rapport with the patient. While formal  
28  
29 guidance outlines general principles of FCP banding and pay structure, variation in banding at  
30  
31 the local sites means that primary care managers are left on their own to try to understand and  
32  
33 make decisions regarding FCP service architecture. Realist evaluation can be used to theorize  
34  
35 these complexities and data collection can be conducted to better understand programme  
36  
37 functioning given resource differences and limitations across local sites.  
38  
39  
40  
41  
42  
43  
44  
45  
46  
47  
48  
49

50 ***3. Contrasting initial programme theories with rival theory statements (i.e., how the same***  
51 ***resources can trigger very different responses and outcomes)***  
52

53 Developing rival theories during the development of the IPTs can help to clarify aspects of the  
54  
55 programme that are not well understood, especially in times of rapid context change. This is  
56  
57  
58  
59

1  
2  
3 because as contexts change, alternative theories may explain resultant shifts in the  
4  
5 programme's architecture as well as successes and failures. Rival theories hypothesize how the  
6  
7 same programme resources can lead to very different mechanism responses and outcomes,  
8  
9 given general expectations of a new initiative. Similarly, contrastive theories can show how  
10  
11 resources of a new initiative are expected to work differently when compared to older  
12  
13 established practices (e.g., FCP versus GP-first models of care). Contrastive theories are also  
14  
15 important to determine the clinical and cost effectiveness of new efforts. Two advantages in  
16  
17 including realist contrastive and rival theories are (a) to help determine if new initiatives  
18  
19 layered on existing services yield at least no worse clinical and cost outcomes than standard  
20  
21 practices alone; and (b) to contrast models to unearth elements of context which would  
22  
23 otherwise remain obscured.  
24  
25  
26  
27  
28

29  
30 In the FRONTIER study, the inclusion of rival and contrastive ideas in theorising was valuable as  
31  
32 it helped to explore the overburdened traditional model of GP-led MSK care delivery. The  
33  
34 realist evaluation was used to understand how different GP practices contract and employ  
35  
36 physiotherapists, to tease out the causal contribution of different facets of the FCP model. One  
37  
38 rival theory pertained to the upskilling and deskilling of GPs when physiotherapists are included  
39  
40 in primary care. It was theorized that the presence of physiotherapists in primary care  
41  
42 unburdens GPs by attending to many of the patients with MSK disorders but results in a de-  
43  
44 skilling effect for GPs in relation to their MSK expertise. A rival theory was also explored: that  
45  
46 physiotherapists working in primary care help GPs upskill in relation to MSK issues by exposure  
47  
48 to specialized knowledge, skills, and innovations that the physiotherapist brings to the practice.  
49  
50 These theories were then tested through data collection.  
51  
52  
53  
54  
55  
56  
57  
58  
59  
60

#### **4. Envision broad system impacts beyond the immediate implementation setting**

New models of service delivery can mean moving resources from one part of a system to another (e.g. moving staff from secondary to primary care). This movement of resources may relieve pressure in the destination area but create new staff challenges in the areas where resources originated. Such re-organization efforts require that realist evaluators theorize the broader impacts of the initiative, as well as the longer-term ripple effects. Although it may be difficult to capture evidence to test theories of broad and longer-term impact, such theorizing may still be useful for future research in the field, as well as for on-going programme monitoring.

The FRONTIER study team explored the idea that FCP is a model that attracts physiotherapists from secondary to primary care settings. It is suspected that some cases this migration has resulted in the depletion of senior physiotherapists in secondary care settings with consequent impact on supervision of junior staff and waiting list times. Such resource depletion may call into question the overall benefits of the FCP initiative across the pathway and create new pressures on physiotherapy services that modify the FCP model of care. The realist evaluation can theorize such impacts and either collect data to test such theories or produce recommendations for future research to investigate the wider impacts.

#### **5. Incorporate rapidly evolving service developments and context changes into the theory testing process in real-time (e.g., Additional Role Reimbursement Scheme, COVID-19)**

Rapid shifts in service development may require realist evaluators to abandon theories developed at the outset of a study in favour of theories that become increasingly relevant over time. The abrupt rupture in the health service landscape brought about by the 2020 COVID-19 pandemic exemplifies the need to study causal impact of contemporary and emergent changes in real time. For rapidly changing models of service delivery, the output of the realist evaluation

1  
2  
3 needs to account for new and divergent approaches that have emerged out of necessity over  
4  
5 the course of the research.  
6

7  
8 The FRONTIER study collected data during the COVID-19 pandemic, which demonstrated how  
9 the pandemic dramatically impacted the FCP service delivery model. The UK- wide lockdown  
10 initiated in March 2020, alongside advice to stop the delivery of all non-essential face-to-face  
11 health and social care [12] created conditions for new programme theorizing in the realist  
12 evaluation. For the physiotherapy profession, the acceleration of on-line consultations meant  
13 an immediate and considerable change to physiotherapy provision with a rapid shift in the way  
14 consultations were conducted and managed. Although this service change was planned for  
15 future implementation (<https://www.longtermplan.nhs.uk/online-version>) the advent of the  
16 pandemic expedited its introduction and created little time for preparation or training. Realist  
17 evaluation can be used to theorize and investigate emerging developments by consulting  
18 expert practitioners and reviewing current policy documents. During FRONTIER data collection,  
19 it was found that whilst some FCP practitioners considered the transition to online service  
20 provision to be a beneficial service development that saved time and was more convenient for  
21 many patients, others questioned whether patients considered it a 'valid' consultation and  
22 raised concerns regarding the greater potential for misdiagnosis and service inefficiencies.  
23  
24 These rival theories served to improve the vision of new service architecture when the current  
25 evidence-base was lacking. From a longitudinal perspective, there is a potential for the shift to  
26 online service provision to have long-term implications for physiotherapy practice and  
27 therefore FCP implementation, although the extent of this impact remains uncertain. In  
28 addition to the impact on practice, the shift has had implications for the proposed FCP  
29  
30  
31  
32  
33  
34  
35  
36  
37  
38  
39  
40  
41  
42  
43  
44  
45  
46  
47  
48  
49  
50  
51  
52  
53  
54  
55  
56  
57  
58  
59  
60

1  
2  
3 programme theories, as the original IPTs for the FRONTIER study were based on physical ('in  
4 house') co-location of FCPs with GPs in primary care. It is possible in a realist evaluation to  
5  
6 construct new IPTs during data collection and test those theories with the remaining resources  
7  
8 of the study.  
9  
10  
11  
12

### 13 **Discussion**

14  
15  
16 There is a need to maintain an iterative and adaptive position to theorizing in realist evaluation  
17  
18 when contexts change rapidly, or the architecture of programming remains unknown. It may  
19  
20 also feel necessary to abandon early theorizing if this becomes out of step with developments.  
21  
22 These are normal processes in realist evaluation, and adequate time should be given to achieve  
23  
24 clarity regarding important aspects of programmes for theory testing. The rapid evolution of  
25  
26 new initiatives can be due to implementation barriers and resource constraints and the  
27  
28 timeframe of a realist evaluation may overlap on such rapid change. In this regard, the foci of  
29  
30 theory development and testing may shift over the duration of a realist investigation. This is  
31  
32 advantageous as the outputs of such realist evaluations may yield important insights regarding  
33  
34 programme success and failure that can be carried forward in future research and programme  
35  
36 monitoring. In addition, the creative thinking that occurs at the outset of a realist study can be  
37  
38 beneficial to study programmes in evolution, as this increases the agility that research teams  
39  
40 need to adapt theory and research protocols. Inevitably, some theories will always be difficult  
41  
42 to test due to a lack of available data. Nonetheless the development of such theories  
43  
44 contributes to a cumulative body of work that lends itself to future study. Initial theorizing may  
45  
46 also yield an over abundance of theories (e.g.,  $n > 30$ ), requiring teams to consolidate and  
47  
48 prioritize those theories for testing. An important lesson from the FRONTIER study is that the  
49  
50  
51  
52  
53  
54  
55  
56  
57  
58  
59  
60



1  
2  
3 creative thinking to develop IPTs conducted at the outset of the study was invaluable even if  
4  
5 not all those theories were taken forward in data collection. It was found that the initial stage  
6  
7 of the realist investigation was as much ‘theory development’ as it was ‘theory sensitization.’  
8  
9

10  
11 As health systems evolve worldwide, it is necessary that methodologies such as realist  
12  
13 evaluation are used and developed to capture the real-time changes and corresponding causal  
14  
15 impacts, to serve the needs of programme implementation. Through the reflections presented  
16  
17 in this paper, we hope our demonstration of realist evaluation and experience in the FRONTIER  
18  
19 study will help other teams improve the design of studies used to assess emerging and rapidly  
20  
21 changing service delivery models.  
22  
23  
24  
25  
26  
27  
28  
29  
30  
31

32 **Contributors:** JJ wrote was responsible for submitting the manuscript. Co-authors HS, SH, RT, CL, MC,  
33 PK, FC, DF, and NW provided multiple rounds of feedback. All authors were involved in the design and  
34 analysis phases of the FRONTIER study.  
35  
36

37  
38 **Funding:** The FRONTIER study is funded by the NIHR [HS&DR] (16/116/03)/HS&DR). The views expressed  
39 are those of the authors and not necessarily those of the NIHR or the Department of Health and Social  
40 Care. No additional funding was allocated for the development of this manuscript.  
41  
42

43 **Competing interests:** The authors declare no competing interests.  
44  
45

46  
47 **Open Access:** I, the Submitting Author has the right to grant and does grant on behalf of all authors of  
48 the Work (as defined in the below author licence), an exclusive licence and/or a non-exclusive licence  
49 for contributions from authors who are: i) UK Crown employees; ii) where BMJ has agreed a CC-BY  
50 licence shall apply, and/or iii) in accordance with the terms applicable for US Federal Government  
51 officers or employees acting as part of their official duties; on a worldwide, perpetual, irrevocable,  
52 royalty-free basis to BMJ Publishing Group Ltd (“BMJ”) its licensees and where the relevant Journal is co-  
53 owned by BMJ to the co-owners of the Journal, to publish the Work in BMJ Open and any other BMJ  
54 products and to exploit all rights, as set out in our licence.  
55  
56  
57  
58  
59  
60

1  
2  
3 The Submitting Author accepts and understands that any supply made under these terms is made by  
4 BMJ to the Submitting Author unless you are acting as an employee on behalf of your employer or a  
5 postgraduate student of an affiliated institution which is paying any applicable article publishing charge  
6 (“APC”) for Open Access articles. Where the Submitting Author wishes to make the Work available on an  
7 Open Access basis (and intends to pay the relevant APC), the terms of reuse of such Open Access shall  
8 be governed by a Creative Commons licence – details of these licences and which Creative Commons  
9 licence will apply to this Work are set out in our licence referred to above.  
10  
11  
12  
13

## 14 References

- 15
- 16
- 17 1. Pawson, R. and N. Tilley, *Realistic Evaluation*. 1997, London: Sage.
- 18 2. Jagosh, J., *Realist Synthesis for Public Health: Building an Ontologically Deep*  
19 *Understanding of How Programs Work, For Whom, and In Which Contexts*. Annual  
20 Review of Public Health, 2019. **40**(1): p. 361-372.
- 21 3. Rycroft-Malone, J., et al., *Realist synthesis: illustrating the method for implementation*  
22 *research*. Implement Sci, 2012. **7**.
- 23 4. *Elective Care High Impact Interventions: First Contact Practitioner for MSK Services*,  
24 N.E.a.N. Improvement. NHS England, 2019.
- 25 5. Jagosh, J., *Retroductive theorizing in Pawson and Tilley's applied scientific realism*.  
26 Journal of Critical Realism, 2020. **19**(2): p. 121-130.
- 27 6. Manzano, A., *The craft of interviewing in realist evaluation*. Evaluation, 2016. **22**(3): p.  
28 342-360.
- 29 7. Dalkin, SM., et al., *What's in a mechanism? Development of a key concept in realist*  
30 *evaluation*. Implementation Science, 2015. **10**(1): p. 49.
- 31 8. Jagosh, J., et al., *A realist evaluation of community-based participatory research:*  
32 *partnership synergy, trust building and related ripple effects*. BMC Public Health, 2015.  
33 **15**(1): p. 725.
- 34 9. Greenhalgh, J. and A. Manzano, *Understanding 'context' in realist evaluation and*  
35 *synthesis*. International Journal of Social Research Methodology, 2021: p. 1-13.
- 36 10. Hunter, R., Gorely, T, Beattie, M et al. *Realist review*. International Review of Sport and  
37 Exercise Psychology, 2022: p. 1-24.
- 38 11. *First Contact Practitioners and Advanced Practitioners in Primary Care:*  
39 *(Musculoskeletal): A Roadmap to Practice*, H.E. England, Editor. 2019.
- 40 12. Downey, A., *GPs urged to go digital to prevent spread of coronavirus*, in *Digital Health*.  
41 2020.
- 42
- 43
- 44
- 45
- 46
- 47
- 48
- 49
- 50
- 51
- 52
- 53
- 54
- 55
- 56
- 57
- 58
- 59
- 60
